# Supplementary material for: The dynamics of the HIV epidemic among men who have sex with men (MSM) from 2005 to 2012 in Shenzhen, China
Source: PubMed Central journal article supplement (PMC4926087; doi:10.1038/srep28703), 2016-06-29
Supplement: srep28703-s1.pdf [file srep28703-s1.pdf]

## SUPPLEMENTARY MATERIAL

### The dynamics of the HIV epidemic among men who have sex with men (MSM) from 2005 to 2012 in Shenzhen, China

**Running title:** Dynamic of the HIV Epidemic among MSM in Shenzhen

Jin Zhao<sup>1, †</sup>, Lin Chen<sup>1, †</sup>, Antoine Chaillon<sup>3, 4, †</sup>, Chenli Zheng<sup>1</sup>, Wende Cai<sup>1</sup>, Zhengrong Yang<sup>1</sup>, Guilian Li<sup>1</sup>, Yongxia Gan<sup>1</sup>, Xiaohui Wang<sup>1</sup>, Yihong Hu<sup>2</sup>, Ping Zhong<sup>5</sup>, Chiyu Zhang<sup>2, 3, 4, \*</sup>, Davey M. Smith<sup>3, 4, \*</sup>

#### Affiliation

1. Shenzhen Center for Disease Control and Prevention, Shenzhen, China
2. Pathogen Diagnostic Center, Institut Pasteur of Shanghai, Chinese Academy of Sciences, Shanghai, China
3. University of California San Diego, La Jolla, California, USA
4. Veterans Affairs Healthcare System San Diego, San Diego, California, USA
5. Shanghai Municipal Center for Disease Control and Prevention, Shanghai, China

\* Corresponding author: Davey M. Smith, University of California San Diego, 9500 Gilman Dr. (mail code 0679), La Jolla, CA 92093 USA, Tel: 858-642-1620, Fax: 858-552-7446, Email: [davey@ucsd.edu](mailto:davey@ucsd.edu)

\* Alternate corresponding author: Chiyu Zhang, Pathogen Diagnostic Center, Institut Pasteur of Shanghai, Chinese Academy of Sciences, 411 Hefei Road,

Shanghai 200025,China, Tel: 86-21-5492-3011, Fax: 86-21-5492-3044 , Email:

[zhangcy1999@ips.ac.cn](mailto:zhangcy1999@ips.ac.cn)

† J. Z., L. C. and A. C. contributed equally to this work.

**Table S1. The places of household registration (*Hukou*) of 996 HIV-1 infected individuals with MSM risk in Shenzhen.**

| <b>Places of household registration (number %)</b> | <b>Provinces of China/other countries</b> | <b>Abbreviation</b> | <b>Number</b> | <b>Percentage (%)</b> |
|----------------------------------------------------|-------------------------------------------|---------------------|---------------|-----------------------|
| Northeastern China<br>(93, 9.3)                    | Beijing                                   | BJ                  | 4             | 0.4                   |
|                                                    | Hebei                                     | HeB                 | 18            | 1.8                   |
|                                                    | Heilongjiang                              | HLJ                 | 31            | 3.1                   |
|                                                    | Inner Mongolia                            | IM                  | 2             | 0.2                   |
|                                                    | Jilin                                     | JL                  | 13            | 1.3                   |
|                                                    | Liaoning                                  | LN                  | 17            | 1.7                   |
|                                                    | Shanxi                                    | SX                  | 8             | 0.8                   |
| Northwestern China<br>(45, 4.5)                    | Gansu                                     | GS                  | 10            | 1.0                   |
|                                                    | Ningxia                                   | NX                  | 2             | 0.2                   |
|                                                    | Qinghai                                   | QH                  | 1             | 0.1                   |
|                                                    | Shannxi                                   | S'X                 | 28            | 2.8                   |
|                                                    | Xinjiang                                  | XJ                  | 4             | 0.4                   |
| Central China<br>(335, 33.6)                       | Henan                                     | HeN                 | 54            | 5.4                   |
|                                                    | Hubei                                     | HuB                 | 98            | 9.8                   |
|                                                    | Hunan                                     | HuN                 | 126           | 12.7                  |
|                                                    | Jiangxi                                   | JX                  | 57            | 5.7                   |
| Eastern China<br>(72, 7.2)                         | Anhui                                     | AH                  | 19            | 1.9                   |
|                                                    | Fujian                                    | FJ                  | 10            | 1.0                   |
|                                                    | Jiangsu                                   | JS                  | 11            | 1.1                   |
|                                                    | Shandong                                  | SD                  | 18            | 1.8                   |

|                                   |             |      |     |       |
|-----------------------------------|-------------|------|-----|-------|
|                                   | Shanghai    | SH   | 5   | 0.5   |
|                                   | Zhejiang    | ZJ   | 9   | 0.9   |
| Southwestern China<br>(214, 21.5) | Chongqing   | CQ   | 29  | 2.9   |
|                                   | Guangxi     | GX   | 52  | 5.2   |
|                                   | Guizhou     | GZ   | 23  | 2.3   |
|                                   | Sichuan     | SC   | 102 | 10.2  |
|                                   | Yunnan      | YN   | 7   | 0.7   |
|                                   | Tibet       | XZ   | 1   | 0.1   |
| Southern China<br>(235, 23.6)     | Guangdong   | GD   | 231 | 23.2  |
|                                   | Hainan      | HaiN | 3   | 0.3   |
|                                   | Hong Kong   | HK   | 1   | 0.1   |
| Other countries<br>(1, 0.1)       | Philippines | PH   | 1   | 0.1   |
| NA                                | NA          | NA   | 1   | 0.1   |
| Total                             |             |      | 996 | 100.0 |

NA, not available.

**Table S2. Information of the primer pairs used in this study.**

| Reactions                 | Primer | Sequence (5'-3')           | Location in HXB2 |
|---------------------------|--------|----------------------------|------------------|
| 1 <sup>st</sup> round PCR | MAW-26 | TGGAAATGTGGAAAGGAAGGAC     | 2032-2050        |
|                           | RT-21  | CTGTATTTCTGCTATTAAGTCTTTTG | 3513-3539        |
| 2 <sup>nd</sup> round PCR | PRO-1* | CAGAGCCAACAGCCCCACCA       | 2147-2166        |
|                           | RT-20* | CTGCCAGTTCTAGCTCTGCTTC     | 3441-3462        |
| Sequencing reaction       | RTA    | GTTGACTCAGATTGGTTGCAC      | 2519-2539        |
|                           | RTB    | CCTAGTATAACAATGAGACAC      | 2946-2967        |

\* The primers for the 2<sup>nd</sup> round PCR amplification were also used for the sequencing reaction.

**Table S3. Mean pairwise genetic distance of Subtype B and CRF 07\_BC  
CRF08\_BC and CRF01\_AE**

| <b>HIV-1 Subtypes</b> | <b>HIV LANL Database<br/>of sequences from<br/>CHina*</b> | <b>Shenzhen study</b> | <b>P value</b> |
|-----------------------|-----------------------------------------------------------|-----------------------|----------------|
| CRF07_BC              | 0.033 (n= 153 seq)                                        | 0.014 (n= 389 seq)    | <0.01          |
| CRF08_BC              | 0.031 (n= 212 seq)                                        | 0.026 (n= 29 seq)     | <0.01          |
| CRF01_AE              | 0.047 (n= 999 seq)                                        | 0.039 (n= 350 seq)    | <0.01          |
| Subtype B             | 0.045 (n= 422 seq)                                        | 0.062 (n= 101seq)     | <0.01          |

\*HIV *pol* sequences from China were downloaded from the HIV LANL database (<http://www.hiv.lanl.gov>) on April 20, 2016. Because the sequences from Shenzhen were not released from the database, they were not included in the downloaded sequences.

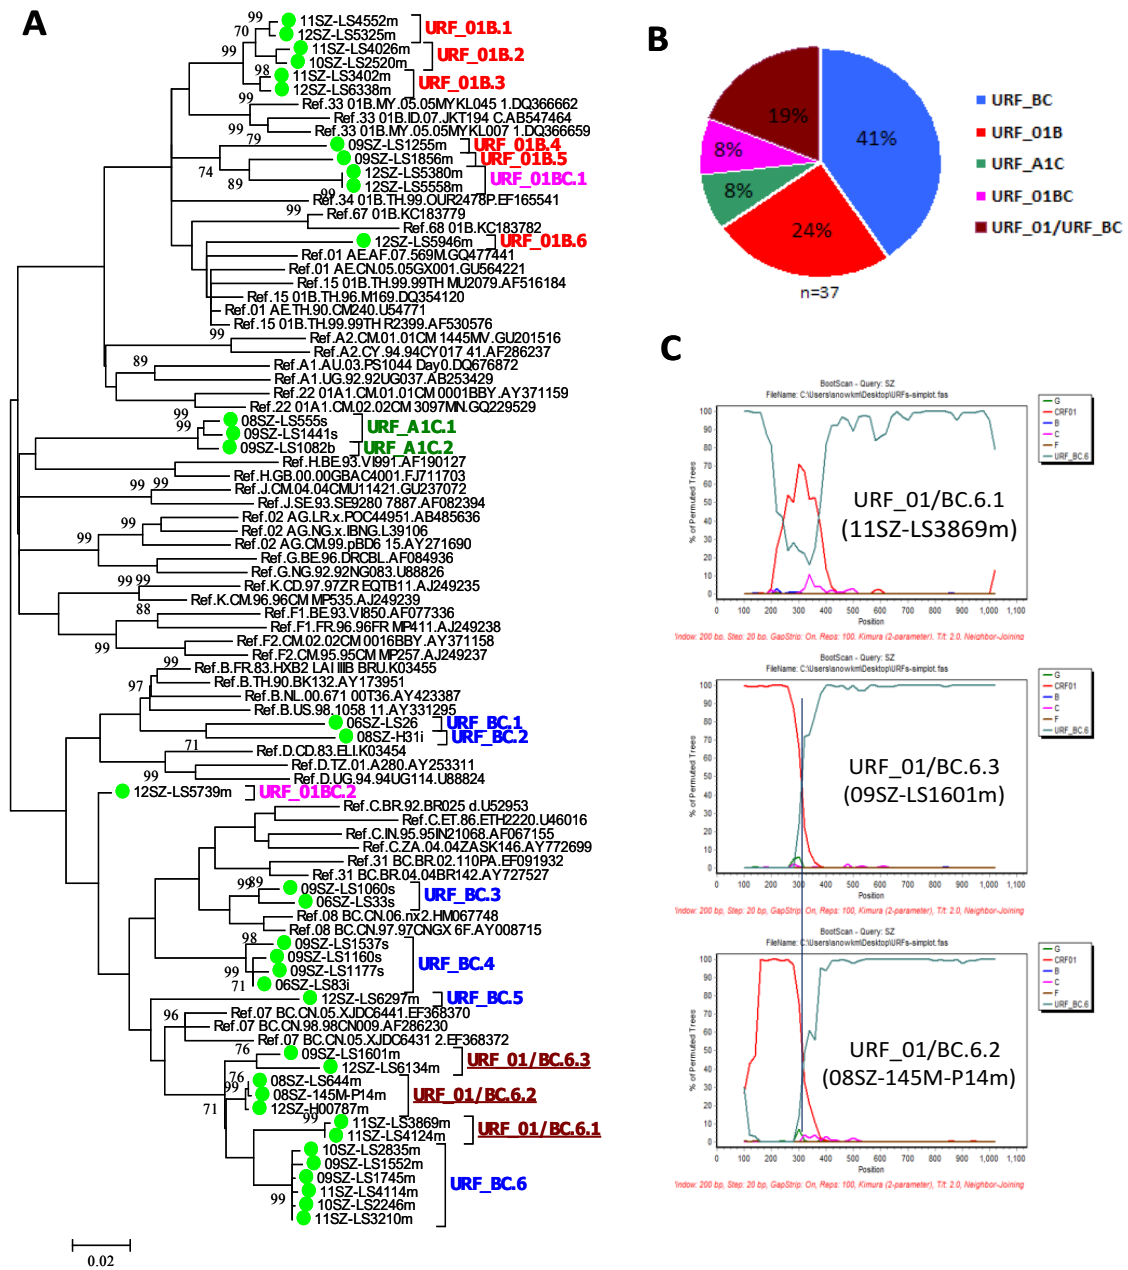

**Fig. S1. HIV-1 URFs identified in Shenzhen from 2006 to 2012.** **A**, the ML tree of the recombinants; **B**, proportion of various recombination forms; **C**, the bootscan plots of the 2<sup>nd</sup> generation URFs between CRF01\_AE and URF\_BC.6. The recombinants were confirmed by Simplot 3.5.1 and RIP, and the results obtained by both methods were consistent. For the 2<sup>nd</sup> generation URFs, only the bootscan plots by Simplot 3.5.1 are shown. There were 37 recombinants identified from 1399 HIV-1 infected individuals, including 26 from 996 MSM. These recombinant forms included 15 (40.5%) URFs\_BC, 9 (24.3%) URFs\_01/B, 3 (8.1%) URFs\_A1/C, 3 (8.1%) URFs\_01BC and 7 (18.9%) URF\_01/URF\_BC (2<sup>nd</sup> generation of URFs between CRF01\_AE and

URFs\_BC). These recombinants formed 19 lineages, including URF\_BC.1-URF\_BC.6, URF\_01B.1-URF\_01B.6, URF\_A1C.1-URF\_A1C.2, URF\_01BC.1-URF\_01BC.2, and URF\_01/URF\_BC.6.1- URF\_01/URF\_BC.6.3. The last characters “m”, “s”, “i” and “b” at the sequence name indicate the sequences from individuals reporting MSM, heterosexual, IDU and bisexual risks, respectively.

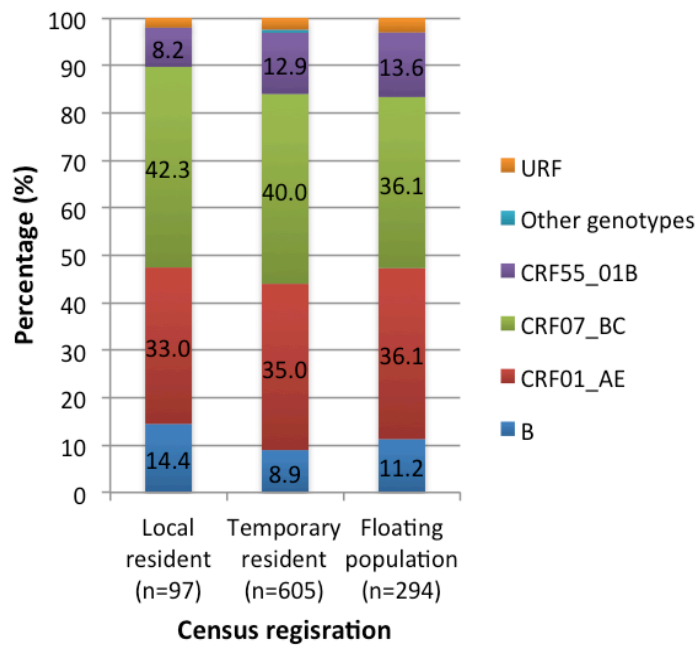

**Fig. S2. HIV-1 genotype distributions by census registration (*Hukou*).**
